# Supplementary material for: Optogenetic activation of serotonergic terminals facilitates GABAergic inhibitory input to orexin/hypocretin neurons
Source: PubMed Central journal article supplement (PMC5099903; doi:10.1038/srep36039), 2016-11-08
Supplement: srep36039-s1.pdf [file srep36039-s1.pdf]

**Optogenetic activation of serotonergic terminals facilitates GABAergic inhibitory input to orexin/hypocretin neurons**

Srikanta Chowdhury<sup>1</sup> and Akihiro Yamanaka<sup>1\*</sup>

<sup>1</sup> Department of Neuroscience II, Research Institute of Environmental Medicine, Nagoya University,  
Nagoya 464-8601, Japan

**\*Corresponding author:**

Akihiro Yamanaka Ph.D.

Department of Neuroscience II, Research Institute of Environmental Medicine

Nagoya University, Nagoya 464-8601, Japan

Tel: +81-52-789-3861

Fax: +81-52-789-3889

E-mail: [yamank@riem.nagoya-u.ac.jp](mailto:yamank@riem.nagoya-u.ac.jp)

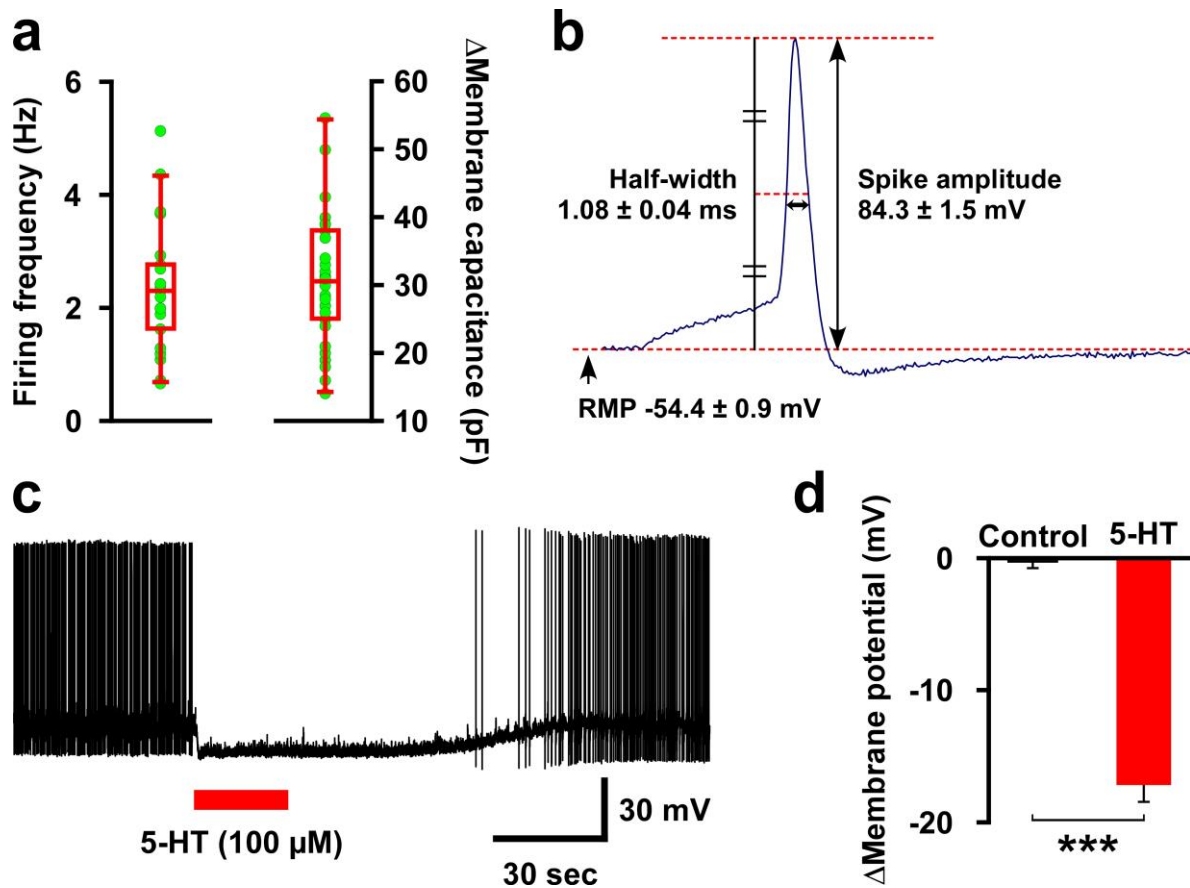

**Supplementary Figure 1. Electrophysiological properties of orexin neurons in triplegenic mice.**

(a) Left: Spontaneous firing frequency recorded by loose cell-attached recording from orexin neurons ( $n = 21$ ). Right: Averaged membrane capacitance of orexin neurons recorded from whole-cell experiments ( $n = 30$ ). Green circles indicate raw data. The mid-horizontal line indicates the median, box gives the 25 and 75%, and whisker indicates 10 and 90% ranges of data. (b) Shape of orexin neuron action potential in the triplegenic mice. Average resting membrane potential, action potential amplitude, and width at half-maximal amplitude are indicated ( $n = 15$ -23). (c, d) Local application of  $100 \mu\text{M}$  5-HT hyperpolarizes orexin neurons. (c) Typical trace showing hyperpolarizing effect of 5-

HT on orexin neurons. (d) Bar diagram summarizing data in c ( $n = 19$ ). Data are provided as mean  $\pm$  s.e.m. ( $p = 3.2 \times 10^{-10}$  by two-tailed Student's  $t$  test).

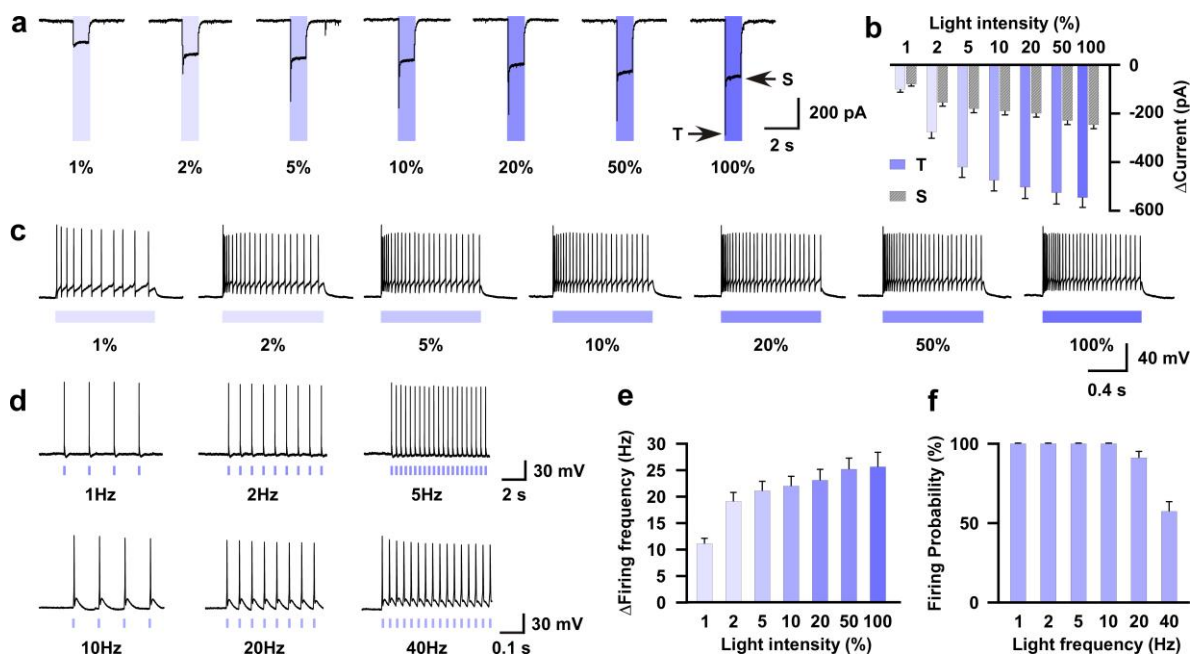

**Supplementary Figure 2. *In vitro* optogenetic activation of 5-HT neurons in the raphe nucleus.**

**(a, b)** Photocurrent data from whole-cell voltage clamp recordings at  $-60 \text{ mV}_{\text{hold}}$ . T = Transient current and S = Sustained current. **(a)** In the presence of QX-314 in the intracellular solution, both transient and sustained currents were increased in a light-intensity dependent manner upon illuminating blue light stimulation ( $475 \pm 17.5 \text{ nm}$ ). **(b)** Summary of data in **a** ( $n = 11$ ). **(c-f)** Whole-cell current clamp recordings from 5-HT neurons. Blue light evoked action potentials during **(c)** continuous application (1 s) of blue light with different intensities and **(d)** blue light pulses (1 ms width and 10% intensity) with different frequencies. **(e)** Summary of data in **c** shows firing frequency increased in a light-intensity dependent manner ( $n = 11$ ). **(f)** Summary of data in **d** shows percent of faithful firing ( $n = 10$ ). All data are shown as mean  $\pm$  s.e.m. Transient currents were measured immediately after light onset and sustained currents were measured just before cessation of light. 5-HT neurons were chosen randomly from both DR and MnR.

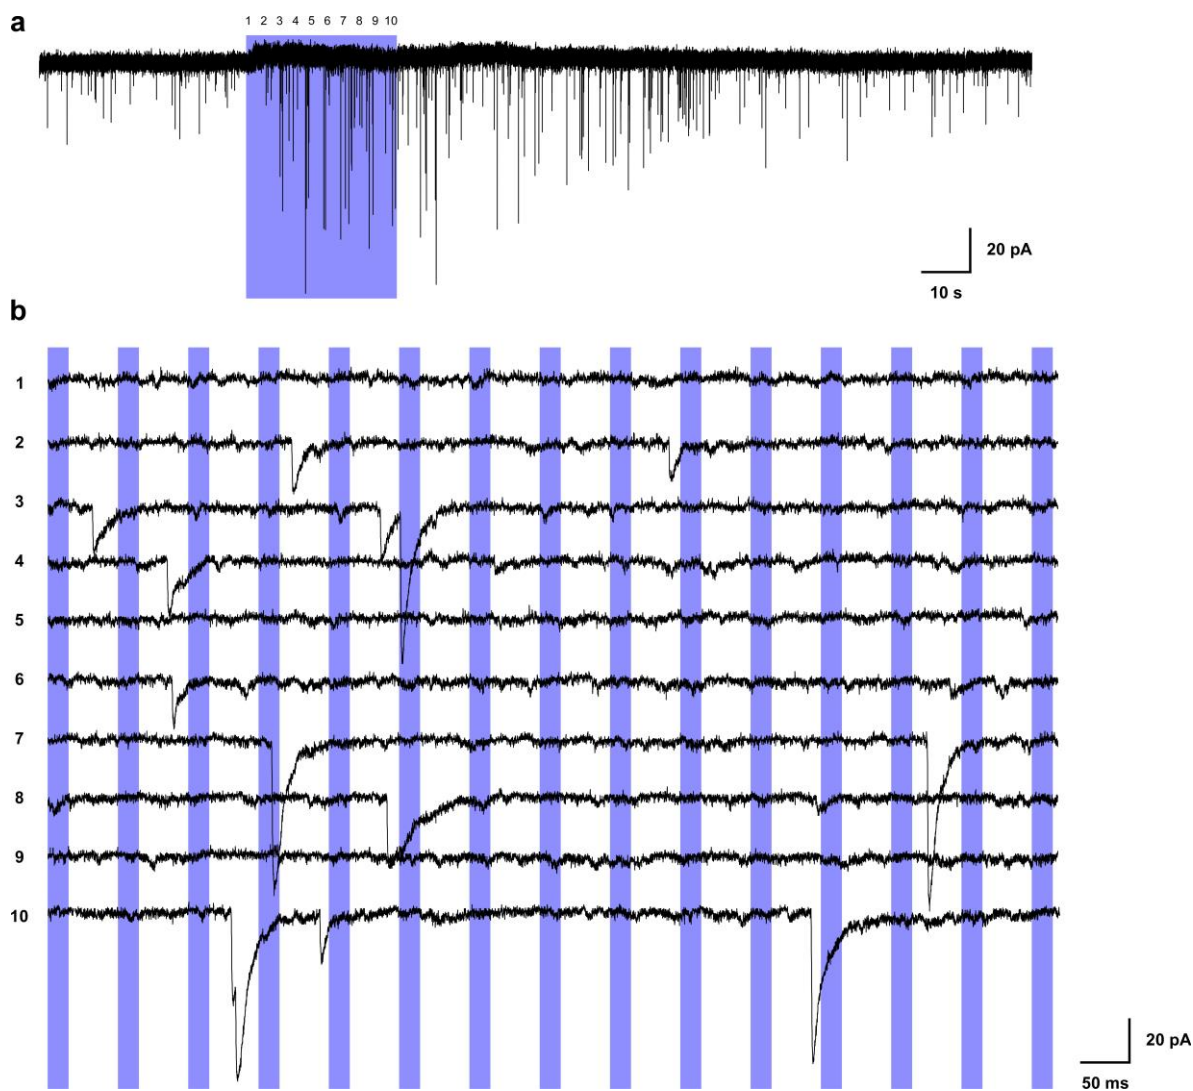

**Supplementary Figure 3. IPSCs in orexin neurons evoked by optogenetic activation of 5-HT nerve terminals are not induced in a precise time-locked manner.** (a) Trace showing light-evoked IPSCs in orexin neurons at  $-60 \text{ mV}_{\text{hold}}$  that were generated by 15 Hz blue light pulses of 20 milliseconds (ms) width and 50% light intensity. (b) Ten enlarged current traces from the traces shown in (a) taken at a defined interval (1 sec trace from every 3 sec) shows that the frequency and amplitude of IPSCs were increased after blue light pulse. However, IPSCs were not precisely time-locked to the blue light pulses.

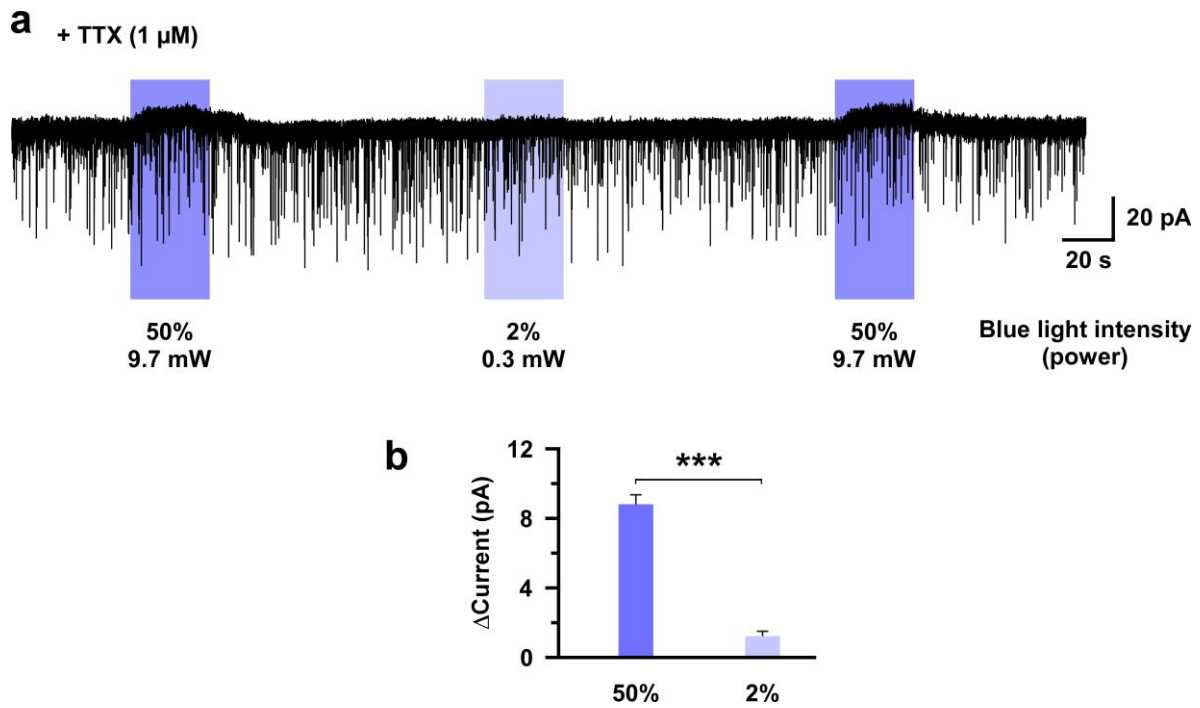

**Supplementary Figure 4. The post synaptic effect of activating 5-HT nerve terminals depends on the blue light intensity.** (a) Traces showing outward currents in orexin neurons generated by blue light of different intensities. (b) Bar graph summarizing the data from experiments shown in (a) ( $n = 8$ ). Data are provided as the mean  $\pm$  s.e.m. ( $p = 1.3 \times 10^{-7}$  by two-tailed Student's  $t$  test).
